# Supplementary material for: Effect of various electrolytes and other wastewater constituents on the degradation of volatile organic compounds in aqueous solution by pulsed power plasma technology
Source: Royal Society of Chemistry journal article supplement (doi:10.1039/d0ew00388c), 2020-01-01
Supplement: d0ew00388c1.pdf [file d0ew00388c1.pdf]

### Supplementary Data

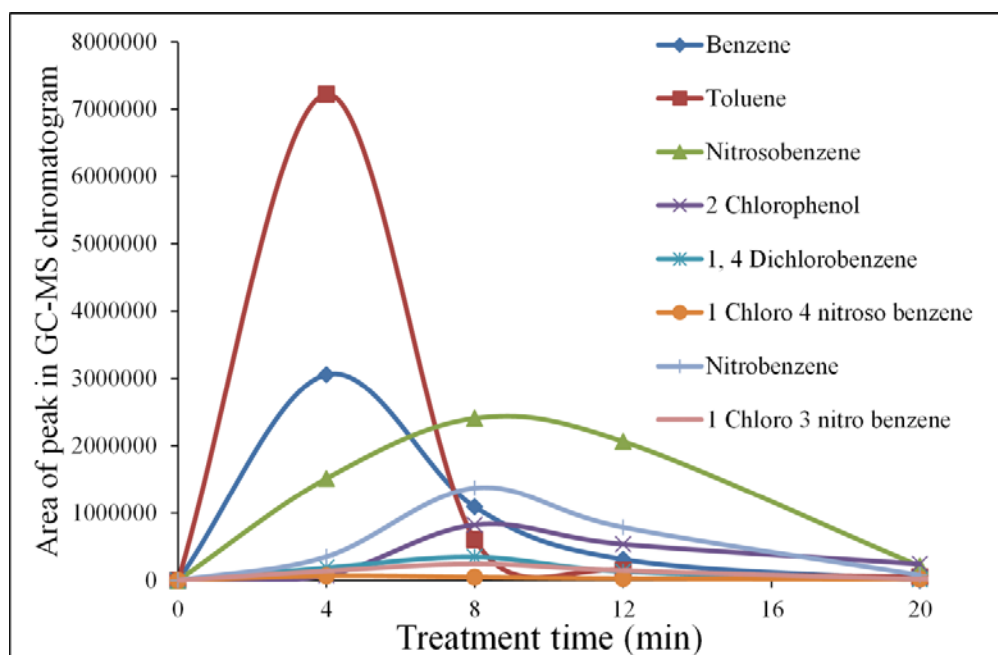

**Fig. S1.** Change in area of the peaks of the intermediates during degradation of chlorobenzene in presence of 10000 mg/L glucose

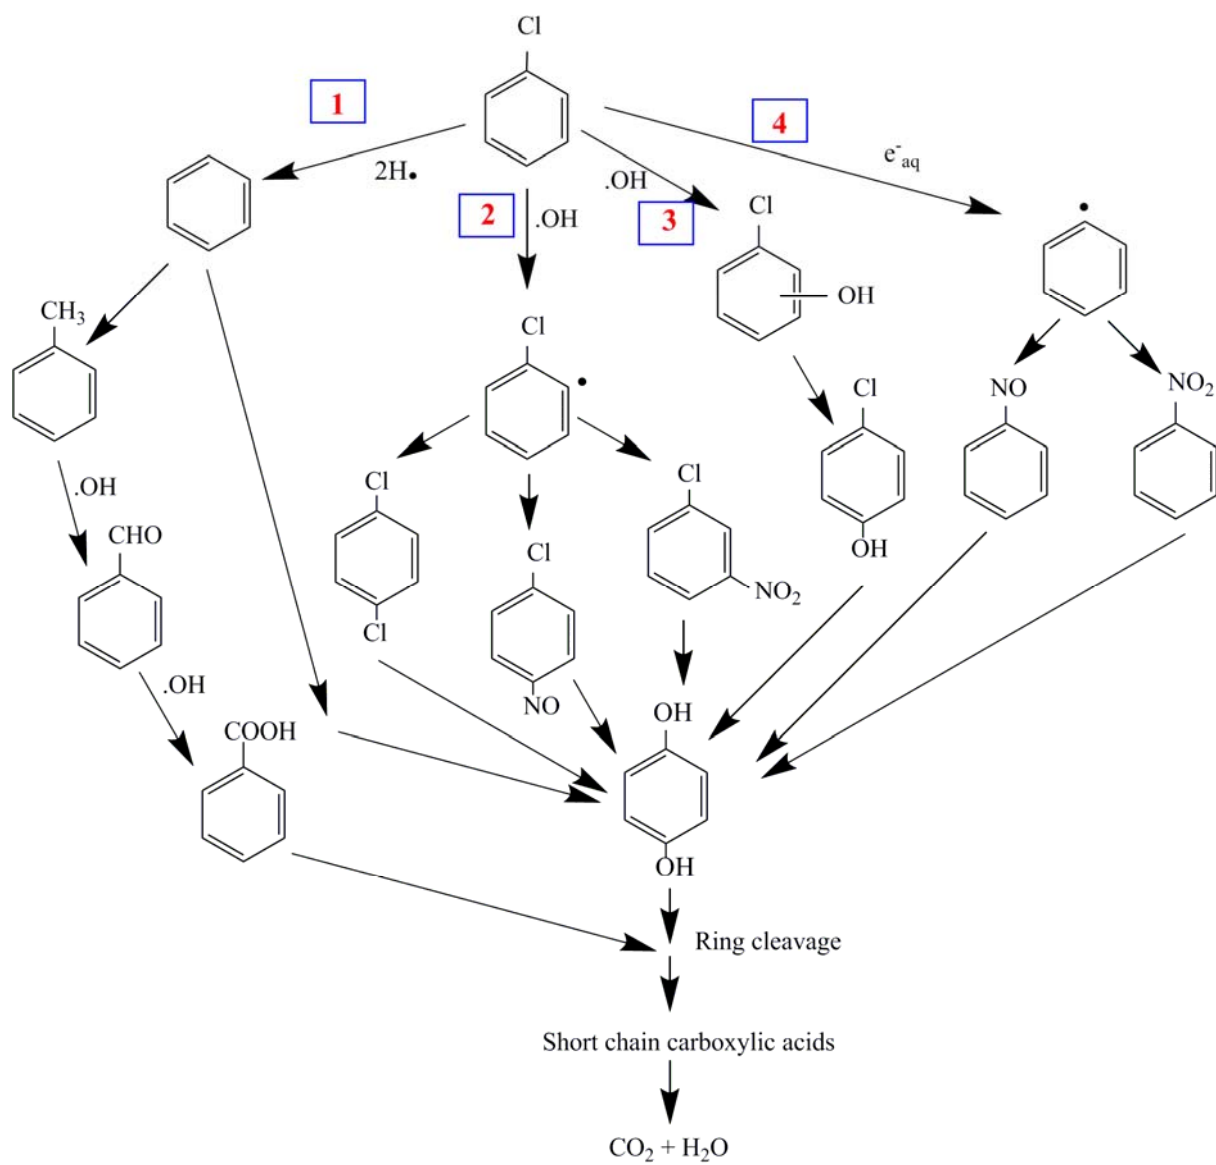

**Fig. S2.** Proposed degradation pathway of chlorobenzene in presence of glucose

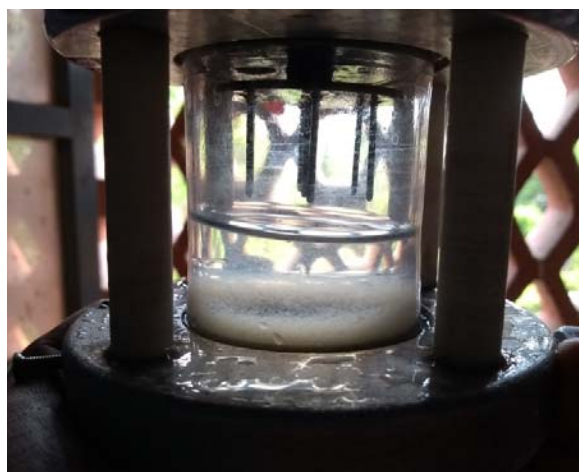

**Fig. S3.** Reactor with flocs settled at bottom

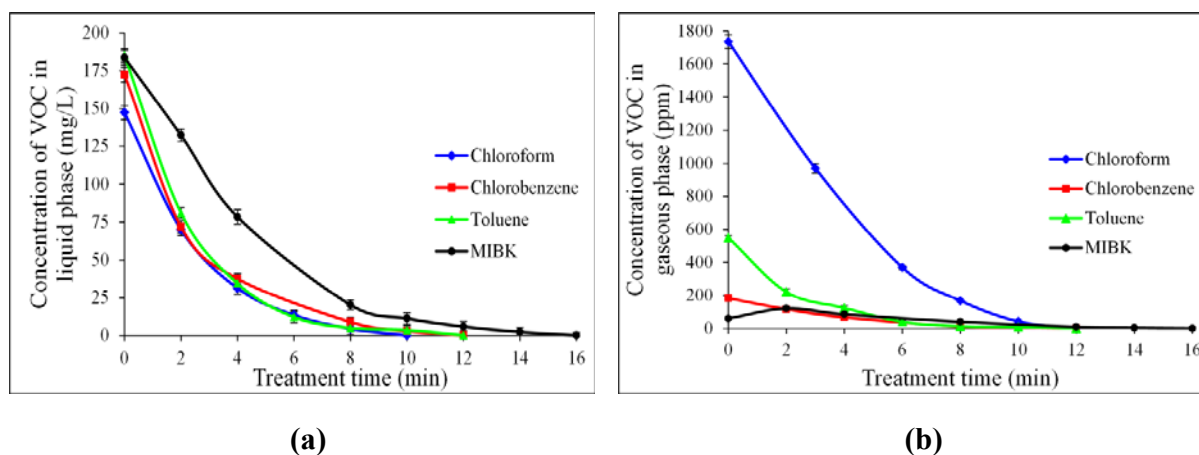

**Fig. S4.** Change in concentration of VOCs in liquid (a) and gaseous (b) phases during plasma treatment (23 kV, 25 Hz)

**Table S1**

COD removal and amount of glucose degraded after 10 min of plasma treatment (17 kV) of 200 mg/L VOC and 5000 mg/L glucose solution

| Pollutant compound | Theoretical COD of 200 mg/L of each VOC (mg/L) | % COD removal of 200 mg/L VOC + 5000 mg/L glucose after 10 min | Glucose (mg/L) degraded after 10 min |
|--------------------|------------------------------------------------|----------------------------------------------------------------|--------------------------------------|
| Chloroform         | 26.8                                           | 39.2                                                           | 1951.0                               |
| Chlorobenzene      | 397.9                                          | 36.7                                                           | 1852.5                               |

|         |       |      |        |
|---------|-------|------|--------|
| Toluene | 625.4 | 38.1 | 1870.4 |
| MIBK    | 542.9 | 37.5 | 1821.6 |

---
